# Supplementary material for: LION LBD: a literature-based discovery system for cancer biology
Source: Oxford University Press journal article supplement (doi:10.1093/bioinformatics/bty845), 2018-10-08
Supplement: bioinformatics_35_9_1553_s5.pdf [file bioinformatics_35_9_1553_s5.pdf]

# Supplementary Information for LION LBD: a Literature-Based Discovery System for Cancer Biology

This document contains supplementary information for the paper *LION LBD: a Literature-Based Discovery System for Cancer Biology*.

## 1 Task setting

For a simple weighted graph  $G = (N, E)$  where  $N$  is the set of nodes,  $E$  the set of edges  $E \subset N \times N$ ,  $w(i, j)$  is the weight of the edge from  $i$  to  $j$  and  $f_g$  a weight aggregation function, the basic closed discovery task for nodes  $a$  and  $c$  can be addressed as

---

```
1: function CLOSEDDISCOVERY( $a, c$ )
2:   for all  $b$  in  $\mathcal{N}(a) \cap \mathcal{N}(c)$  do
3:     yield  $b, f_g(w(a, b), w(b, c))$ 
```

---

where  $\mathcal{N}(i) = \{j \mid (i, j) \in E\}$  is the set of neighbours of node  $i$  and **yield** is defined as in Python as generating a sequence of returned values. Given an accumulation function  $f_c$  and a corresponding initial value  $s_0$  (e.g. 0 for *sum* and  $-\infty$  for *max*), open discovery can be similarly cast as

---

```
1: function OPENDISCOVERY( $a$ )
2:   for all  $c$  in  $\mathcal{N}(\mathcal{N}(a)) \setminus \mathcal{N}(a)$  do
3:      $s_c \leftarrow s_0$ 
4:     for all  $b \in \mathcal{N}(a)$  do
5:       for all  $c \in \mathcal{N}(b) \setminus \mathcal{N}(a)$  do
6:          $s_c \leftarrow f_c(s_c, f_g(w(a, b), w(b, c)))$ 
7:     for all  $c$  in  $\mathcal{N}(\mathcal{N}(a)) \setminus \mathcal{N}(a)$  do
8:       yield  $c, s_c$ 
```

---

As the relevant neighbour set operations can be implemented in linear time, the former algorithm has linear and the latter quadratic complexity with respect to the number of neighbours.<sup>1</sup>

---

<sup>1</sup>While fully sorting the returned (*node, score*) sequences requires  $O(n \log n)$  time, the top  $k$  highest-scoring nodes can be determined in linear time, thus not impacting the overall complexity in either case.

## 2 Metrics

For terms  $a$  and  $b$ , we denote below the number of contexts where the terms (co-)occur by  $C$  and the total number of contexts by  $N$ . The *Count* and *Doc-count* metrics for an edge between nodes representing  $a$  and  $b$  are defined simply as  $C(a, b)$  where the context is defined as a sentence for the former and a document for the latter. The context is set as sentence for all other metrics.

Pointwise mutual information (PMI) is defined as

$$w_{\text{PMI}}(a, b) = \log \frac{P(a, b)}{P(a) P(b)} = \log \frac{C(a, b)N}{C(a)C(b)} \quad (1)$$

and the normalized PMI (NPMI) metric as

$$w_{\text{NPMI}}(a, b) = \frac{w_{\text{PMI}}(a, b)}{-\log(P(a, b))} = \frac{\log \frac{C(a, b)N}{C(a)C(b)}}{\log \frac{N}{C(a, b)}} \quad (2)$$

Symmetric conditional probability (SCP) is

$$w_{\text{SCP}}(a, b) = P(a|b) P(b|a) = \frac{P(a, b)^2}{P(a) P(b)} = \frac{C(a, b)^2}{C(a)C(b)} \quad (3)$$

and the Jaccard index as

$$w_{\text{Jaccard}}(a, b) = \frac{C(a, b)}{C(a) + C(b) - C(a, b)} \quad (4)$$

The Chi-squared ( $\chi^2$ ) metric is defined based on the contingency matrices of the observed and expected values as

$$w_{\chi^2} = \frac{N(C(a, b)(N + C(a, b) - C(a) - C(b)) - (C(a) - C(a, b))(C(b) - C(a, b)))^2}{C(a)C(b)(N - C(a))(N - C(b))} \quad (5)$$

and the Student's  $t$ -test statistic as

$$w_{t\text{-test}} = \frac{NC(a, b) - C(a)C(b)}{N\sqrt{C(a, b)}} \quad (6)$$

Finally, the log likelihood ratio (LLR) is estimated as

$$\begin{aligned} w_{\text{LLR}} = 2 & \left( C(a, b) \log \frac{C(a, b)N}{C(a)C(b)} + (C(b) - C(a, b)) \log \frac{N(C(b) - C(a, b))}{C(b)(N - C(a))} \right. \\ & + (C(a) - C(a, b)) \log \frac{N(C(a) - C(a, b))}{C(a)(N - C(b))} \\ & \left. + (N - C(a) - C(b) + C(a, b)) \log \frac{N(N - C(a) - C(b) + C(a, b))}{(N - C(a))(N - C(b))} \right) \quad (7) \end{aligned}$$

### 3 Results for cancer discoveries

Tables 1-5 present the detailed closed discovery results and Tables 6-10 the open discovery results for the five cancer discoveries test cases. In addition to the rank of the target concept among the returned results, we also report the total number of results ( $n$ ) and the relative rank of the target. In all result tables, the best result in each row is underlined and the best result in each column in bold.

| Metric    | Aggregation function $f_g$ |                   |                   |
|-----------|----------------------------|-------------------|-------------------|
|           | min                        | avg               | max               |
| NPMI      | 47 (2.00%)                 | <b>38</b> (1.61%) | 120 (5.19%)       |
| SCP       | <u>10</u> (0.39%)          | 60 (2.57%)        | 65 (2.79%)        |
| $\chi^2$  | <u>8</u> (0.31%)           | 60 (2.57%)        | 65 (2.79%)        |
| $t$ -test | <u>6</u> (0.22%)           | <b>21</b> (0.87%) | <b>46</b> (1.96%) |
| LLR       | <u>8</u> (0.31%)           | 47 (2.00%)        | 49 (2.09%)        |
| Jaccard   | <u>4</u> (0.13%)           | 34 (1.44%)        | <b>46</b> (1.96%) |
| Count     | <u>19</u> (0.78%)          | 47 (2.00%)        | 50 (2.14%)        |
| Doc-count | <u>27</u> (1.13%)          | 49 (2.09%)        | 56 (2.40%)        |

Table 1: Closed discovery results for A=PR:000001754 (NF- $\kappa$ B), B=PR:000002307 (Bcl-2), C=MESH:D000236 (Adenoma), query year 2011,  $n = 2294$ .

| Metric    | Aggregation function $f_g$ |                     |                     |
|-----------|----------------------------|---------------------|---------------------|
|           | min                        | avg                 | max                 |
| NPMI      | 504 (76.91%)               | 379 (57.80%)        | <u>238</u> (36.24%) |
| SCP       | 564 (86.09%)               | 196 (29.82%)        | <u>184</u> (27.98%) |
| $\chi^2$  | 485 (74.01%)               | 196 (29.82%)        | <u>184</u> (27.98%) |
| $t$ -test | 487 (74.31%)               | 275 (41.90%)        | <b>127</b> (19.27%) |
| LLR       | 486 (74.16%)               | <b>163</b> (24.77%) | <u>143</u> (21.71%) |
| Jaccard   | 515 (78.59%)               | 213 (32.42%)        | <u>169</u> (25.69%) |
| Count     | <b>429</b> (65.44%)        | 181 (27.52%)        | <u>158</u> (24.01%) |
| Doc-count | 508 (77.52%)               | 169 (25.69%)        | <u>151</u> (22.94%) |

Table 2: Closed discovery results for A=PR:000011331 (NOTCH1), B=HOC:42 (senescence), C=PR:000005308 (C/EBP $\beta$ ), query year 2011,  $n = 654$ .

| Metric    | Aggregation function $f_g$ |                  |                  |
|-----------|----------------------------|------------------|------------------|
|           | min                        | avg              | max              |
| NPMI      | 22 (4.94%)                 | <b>3</b> (0.47%) | <b>5</b> (0.94%) |
| SCP       | <u>3</u> (0.47%)           | 5 (0.94%)        | <b>5</b> (0.94%) |
| $\chi^2$  | <u>3</u> (0.47%)           | 5 (0.94%)        | <b>5</b> (0.94%) |
| $t$ -test | <u>6</u> (1.18%)           | 16 (3.53%)       | 21 (4.71%)       |
| LLR       | <u>5</u> (0.94%)           | 17 (3.76%)       | 17 (3.76%)       |
| Jaccard   | <u>2</u> (0.23%)           | 4 (0.71%)        | <b>5</b> (0.94%) |
| Count     | <u>12</u> (2.59%)          | 23 (5.18%)       | 23 (5.18%)       |
| Doc-count | <u>12</u> (2.59%)          | 26 (5.88%)       | 27 (6.12%)       |

Table 3: Closed discovery results for A=PR:000001138 (IL-17), B=PR:000003107 (p38 $\alpha$ ), C=PR:000006736 (MKP-1), query year 2010,  $n = 425$ .

| Metric    | Aggregation function $f_g$ |                     |                     |
|-----------|----------------------------|---------------------|---------------------|
|           | min                        | avg                 | max                 |
| NPMI      | <u>86</u> (19.14%)         | <b>119</b> (26.58%) | <b>170</b> (38.06%) |
| SCP       | <u>70</u> (15.54%)         | 249 (55.86%)        | 284 (63.74%)        |
| $\chi^2$  | <u>74</u> (16.44%)         | 212 (47.52%)        | 224 (50.23%)        |
| $t$ -test | <b>56</b> (12.39%)         | 136 (30.41%)        | 237 (53.15%)        |
| LLR       | <u>65</u> (14.41%)         | 203 (45.49%)        | 240 (53.83%)        |
| Jaccard   | <u>81</u> (18.02%)         | 230 (51.58%)        | 253 (56.76%)        |
| Count     | <u>245</u> (54.95%)        | 263 (59.01%)        | 258 (57.88%)        |
| Doc-count | <u>231</u> (51.80%)        | 329 (73.87%)        | 323 (72.52%)        |

Table 4: Closed discovery results for A=PR:000011170 (Nrf2), B=CHEBI:26523 (ROS), C=MESH:D010190 (pancreatic cancer), query year 2006,  $n = 444$ .

| Metric    | Aggregation function $f_g$ |                     |                     |
|-----------|----------------------------|---------------------|---------------------|
|           | min                        | avg                 | max                 |
| NPMI      | <u>732</u> (69.69%)        | 824 (78.46%)        | 877 (83.51%)        |
| SCP       | <u>614</u> (58.44%)        | 915 (87.13%)        | 955 (90.94%)        |
| $\chi^2$  | <u>771</u> (73.40%)        | 817 (77.79%)        | 871 (82.94%)        |
| $t$ -test | <u>755</u> (71.88%)        | 786 (74.83%)        | 873 (83.13%)        |
| LLR       | <u>766</u> (72.93%)        | 802 (76.36%)        | 871 (82.94%)        |
| Jaccard   | <u>472</u> (44.90%)        | 813 (77.41%)        | 935 (89.04%)        |
| Count     | <u>461</u> (43.85%)        | 734 (69.88%)        | 737 (70.16%)        |
| Doc-count | <b>406</b> (38.61%)        | <b>549</b> (52.24%) | <b>554</b> (52.72%) |

Table 5: Closed discovery results for A=PR:000006066 (CXCL12), B=HOC:42 (senescence), C=MESH:D013964 (thyroid cancer), query year 2012,  $n = 1049$ .

| Metric    | Accumulation function $f_c$ ( Aggregation function $f_g$ ) |                   |                    |                   |                    |                   |
|-----------|------------------------------------------------------------|-------------------|--------------------|-------------------|--------------------|-------------------|
|           | sum(min)                                                   | max(min)          | sum(avg)           | max(avg)          | sum(max)           | max(max)          |
| NPMI      | 137498 (99.98%)                                            | 18377 (13.36%)    | 784 (0.57%)        | 24071 (17.50%)    | <b>1</b> (0.00%)   | 7407 (5.39%)      |
| SCP       | <u>42</u> (0.03%)                                          | 925 (0.67%)       | 336 (0.24%)        | 1286 (0.93%)      | 338 (0.25%)        | 1221 (0.89%)      |
| $\chi^2$  | 87183 (63.40%)                                             | 2241 (1.63%)      | <u>357</u> (0.26%) | 1389 (1.01%)      | <u>357</u> (0.26%) | 1198 (0.87%)      |
| $t$ -test | 137514 (99.99%)                                            | 56 (0.04%)        | 137489 (99.98%)    | <b>10</b> (0.01%) | <u>2</u> (0.00%)   | 25 (0.02%)        |
| LLR       | 137468 (99.96%)                                            | 169 (0.12%)       | <b>1</b> (0.00%)   | 434 (0.31%)       | <b>1</b> (0.00%)   | 441 (0.32%)       |
| Jaccard   | <b>1</b> (0.00%)                                           | 70 (0.05%)        | <b>1</b> (0.00%)   | 1168 (0.85%)      | <b>1</b> (0.00%)   | 1394 (1.01%)      |
| Count     | <b>1</b> (0.00%)                                           | <b>19</b> (0.01%) | <b>1</b> (0.00%)   | 22 (0.01%)        | <u>2</u> (0.00%)   | 23 (0.02%)        |
| Doc-count | <b>1</b> (0.00%)                                           | 60 (0.04%)        | <u>2</u> (0.00%)   | 19 (0.01%)        | <u>2</u> (0.00%)   | <b>19</b> (0.01%) |

Table 6: Open discovery results for A=PR:000001754 (NF- $\kappa$ B), C=MESH:D000236 (Adenoma), query year 2011,  $n = 137522$ .

| Metric    | Accumulation function $f_c$ ( Aggregation function $f_g$ ) |                    |                    |                    |                    |                    |
|-----------|------------------------------------------------------------|--------------------|--------------------|--------------------|--------------------|--------------------|
|           | sum(min)                                                   | max(min)           | sum(avg)           | max(avg)           | sum(max)           | max(max)           |
| NPMI      | <b>10</b> (0.01%)                                          | 7887 (6.25%)       | <b>7</b> (0.00%)   | 4817 (3.82%)       | <b>20</b> (0.01%)  | 1400 (1.11%)       |
| SCP       | <u>276</u> (0.22%)                                         | 2773 (2.20%)       | 400 (0.32%)        | 411 (0.32%)        | 399 (0.31%)        | 408 (0.32%)        |
| $\chi^2$  | 448 (0.35%)                                                | 3843 (3.04%)       | <u>402</u> (0.32%) | 412 (0.33%)        | <u>402</u> (0.32%) | 409 (0.32%)        |
| $t$ -test | 118751 (94.11%)                                            | <b>626</b> (0.50%) | <u>19</u> (0.01%)  | 1252 (0.99%)       | 145 (0.11%)        | 1375 (1.09%)       |
| LLR       | <u>57</u> (0.04%)                                          | 951 (0.75%)        | 382 (0.30%)        | 646 (0.51%)        | 472 (0.37%)        | 645 (0.51%)        |
| Jaccard   | <u>13</u> (0.01%)                                          | 1991 (1.58%)       | 67 (0.05%)         | <b>259</b> (0.20%) | 93 (0.07%)         | <b>258</b> (0.20%) |
| Count     | <u>382</u> (0.30%)                                         | 3285 (2.60%)       | 829 (0.66%)        | 3586 (2.84%)       | 933 (0.74%)        | 2393 (1.90%)       |
| Doc-count | <u>372</u> (0.29%)                                         | 3262 (2.58%)       | 942 (0.75%)        | 3292 (2.61%)       | 1088 (0.86%)       | 2736 (2.17%)       |

Table 7: Open discovery results for A=PR:000011331 (NOTCH1), C=PR:000005308 (C/EBP $\beta$ ), query year 2011,  $n = 126179$ .

## 4 Results for Swanson’s discoveries

Tables 11-15 present the detailed open discovery results for the Swanson’s discoveries test cases. As for the cancer discoveries evaluation above, we report the rank of the target concept among

| Metric    | sum(min)           | Accumulation function $f_c$ ( |                   | Aggregation function $f_g$ ) |                     |                    |
|-----------|--------------------|-------------------------------|-------------------|------------------------------|---------------------|--------------------|
|           |                    | max(min)                      | sum(avg)          | max(avg)                     | sum(max)            | max(max)           |
| NPMI      | <b>23</b> (0.02%)  | 4181 (3.52%)                  | 27 (0.02%)        | 5897 (4.97%)                 | <b>149</b> (0.12%)  | 2268 (1.91%)       |
| SCP       | <u>532</u> (0.45%) | 6989 (5.89%)                  | 658 (0.55%)       | 1176 (0.99%)                 | 661 (0.56%)         | <b>727</b> (0.61%) |
| $\chi^2$  | <u>547</u> (0.46%) | 4969 (4.18%)                  | 652 (0.55%)       | 1159 (0.97%)                 | 656 (0.55%)         | 1159 (0.97%)       |
| $t$ -test | 105625 (88.96%)    | 1579 (1.33%)                  | <b>16</b> (0.01%) | 1152 (0.97%)                 | 289 (0.24%)         | 2386 (2.01%)       |
| LLR       | <u>212</u> (0.18%) | 1935 (1.63%)                  | 469 (0.39%)       | 2907 (2.45%)                 | 537 (0.45%)         | 6823 (5.75%)       |
| Jaccard   | <u>135</u> (0.11%) | <b>1089</b> (0.92%)           | 353 (0.30%)       | <b>962</b> (0.81%)           | 394 (0.33%)         | 1122 (0.94%)       |
| Count     | 1435 (1.21%)       | 5495 (4.63%)                  | 1124 (0.95%)      | 3709 (3.12%)                 | <u>1053</u> (0.89%) | 1860 (1.57%)       |
| Doc-count | 1566 (1.32%)       | 6235 (5.25%)                  | 1291 (1.09%)      | 2815 (2.37%)                 | <u>1232</u> (1.04%) | 7481 (6.30%)       |

Table 8: Open discovery results for A=PR:000001138 (IL-17), C=PR:000006736 (MKP-1), query year 2010,  $n = 118735$ .

| Metric    | sum(min)           | Accumulation function $f_c$ ( |                   | Aggregation function $f_g$ ) |                     |                   |
|-----------|--------------------|-------------------------------|-------------------|------------------------------|---------------------|-------------------|
|           |                    | max(min)                      | sum(avg)          | max(avg)                     | sum(max)            | max(max)          |
| NPMI      | 98698 (99.75%)     | 27373 (27.66%)                | 121 (0.12%)       | 17420 (17.61%)               | <b>36</b> (0.03%)   | 4992 (5.04%)      |
| SCP       | <u>316</u> (0.32%) | 926 (0.93%)                   | 1034 (1.04%)      | 3709 (3.75%)                 | 1039 (1.05%)        | 3638 (3.68%)      |
| $\chi^2$  | 98463 (99.51%)     | 3582 (3.62%)                  | 1252 (1.26%)      | 3889 (3.93%)                 | <u>1233</u> (1.25%) | 3994 (4.04%)      |
| $t$ -test | 98747 (99.80%)     | <b>63</b> (0.06%)             | 98406 (99.45%)    | 325 (0.33%)                  | 69 (0.07%)          | 176 (0.18%)       |
| LLR       | 98677 (99.73%)     | <u>187</u> (0.19%)            | 344 (0.35%)       | 666 (0.67%)                  | 319 (0.32%)         | 640 (0.65%)       |
| Jaccard   | 268 (0.27%)        | 5062 (5.11%)                  | 107 (0.11%)       | 2219 (2.24%)                 | <u>104</u> (0.10%)  | 2451 (2.48%)      |
| Count     | <b>15</b> (0.01%)  | 514 (0.52%)                   | <b>55</b> (0.06%) | <b>49</b> (0.05%)            | 55 (0.06%)          | <b>49</b> (0.05%) |
| Doc-count | <u>23</u> (0.02%)  | 414 (0.42%)                   | 56 (0.06%)        | 52 (0.05%)                   | 57 (0.06%)          | 52 (0.05%)        |

Table 9: Open discovery results for A=PR:000011170 (Nrf2), C=MESH:D010190 (pancreatic cancer), query year 2006,  $n = 98945$ .

| Metric    | sum(min)          | Accumulation function $f_c$ ( |                   | Aggregation function $f_g$ ) |                   |                   |
|-----------|-------------------|-------------------------------|-------------------|------------------------------|-------------------|-------------------|
|           |                   | max(min)                      | sum(avg)          | max(avg)                     | sum(max)          | max(max)          |
| NPMI      | 132123 (99.71%)   | 15476 (11.68%)                | 612 (0.46%)       | 4568 (3.45%)                 | 95 (0.07%)        | 1329 (1.00%)      |
| SCP       | <u>58</u> (0.04%) | 179 (0.13%)                   | 341 (0.26%)       | 460 (0.35%)                  | 343 (0.26%)       | 533 (0.40%)       |
| $\chi^2$  | 296 (0.22%)       | <u>223</u> (0.17%)            | 354 (0.27%)       | 757 (0.57%)                  | 359 (0.27%)       | 588 (0.44%)       |
| $t$ -test | 132397 (99.92%)   | <b>4</b> (0.00%)              | 132356 (99.89%)   | 57 (0.04%)                   | 125 (0.09%)       | 163 (0.12%)       |
| LLR       | 132161 (99.74%)   | <u>5</u> (0.00%)              | 69 (0.05%)        | 406 (0.31%)                  | 73 (0.05%)        | 805 (0.61%)       |
| Jaccard   | <u>29</u> (0.02%) | 497 (0.37%)                   | 78 (0.06%)        | 155 (0.12%)                  | 89 (0.07%)        | 705 (0.53%)       |
| Count     | <b>4</b> (0.00%)  | 1005 (0.76%)                  | <b>54</b> (0.04%) | <b>52</b> (0.04%)            | <b>62</b> (0.05%) | <b>54</b> (0.04%) |
| Doc-count | <u>10</u> (0.01%) | 738 (0.56%)                   | 72 (0.05%)        | 68 (0.05%)                   | 74 (0.06%)        | 68 (0.05%)        |

Table 10: Open discovery results for A=PR:000006066 (CXCL12), C=MESH:D013964 (thyroid cancer), query year 2012,  $n = 132503$ .

the results, the total number of results ( $n$ ), and the relative rank of the target. As above, the best result in each row is underlined and the best result in each column in bold in all result tables.

| Metric    | sum(min)          | Accumulation function $f_c$ ( |                   | Aggregation function $f_g$ ) |                   |                   |
|-----------|-------------------|-------------------------------|-------------------|------------------------------|-------------------|-------------------|
|           |                   | max(min)                      | sum(avg)          | max(avg)                     | sum(max)          | max(max)          |
| NPMI      | 37835 (99.85%)    | 8869 (23.41%)                 | 790 (2.08%)       | 9229 (24.36%)                | <u>74</u> (0.20%) | 1317 (3.48%)      |
| SCP       | 327 (0.86%)       | 592 (1.56%)                   | <u>70</u> (0.18%) | 82 (0.22%)                   | 71 (0.19%)        | 82 (0.22%)        |
| $\chi^2$  | 37827 (99.83%)    | 7820 (20.64%)                 | 75 (0.20%)        | 84 (0.22%)                   | <u>74</u> (0.20%) | 84 (0.22%)        |
| $t$ -test | 37822 (99.82%)    | 2517 (6.64%)                  | 37368 (98.62%)    | 15 (0.04%)                   | 18 (0.05%)        | <u>14</u> (0.04%) |
| LLR       | 37820 (99.81%)    | 3404 (8.98%)                  | <b>9</b> (0.02%)  | <b>9</b> (0.02%)             | <b>9</b> (0.02%)  | <b>9</b> (0.02%)  |
| Jaccard   | 51 (0.13%)        | 1728 (4.56%)                  | <u>26</u> (0.07%) | 66 (0.17%)                   | <u>26</u> (0.07%) | 66 (0.17%)        |
| Count     | <u>16</u> (0.04%) | 56 (0.15%)                    | 20 (0.05%)        | 21 (0.06%)                   | 21 (0.06%)        | 18 (0.05%)        |
| Doc-count | <b>15</b> (0.04%) | <u>1</u> (0.00%)              | 20 (0.05%)        | 24 (0.06%)                   | 21 (0.06%)        | 17 (0.04%)        |

Table 11: Open discovery results for A=MESH:D008881 (Migraine), C=MESH:D008274 (Magnesium), query year 1983,  $n = 37892$ .

| Metric    | Accumulation function $f_c$ ( |                   | Aggregation function $f_g$ ) |                   |                  |                   |
|-----------|-------------------------------|-------------------|------------------------------|-------------------|------------------|-------------------|
|           | sum(min)                      | max(min)          | sum(avg)                     | max(avg)          | sum(max)         | max(max)          |
| NPMI      | 11 (0.03%)                    | 267 (0.65%)       | <u>1</u> (0.00%)             | 811 (1.97%)       | <b>2</b> (0.00%) | 514 (1.25%)       |
| SCP       | <u>23</u> (0.06%)             | 31 (0.08%)        | 154 (0.37%)                  | 200 (0.49%)       | 154 (0.37%)      | 199 (0.48%)       |
| $\chi^2$  | <u>29</u> (0.07%)             | <u>29</u> (0.07%) | 156 (0.38%)                  | 200 (0.49%)       | 155 (0.38%)      | 200 (0.49%)       |
| $t$ -test | 40103 (97.50%)                | 56 (0.14%)        | <u>1</u> (0.00%)             | 116 (0.28%)       | 3 (0.01%)        | 105 (0.26%)       |
| LLR       | 36 (0.09%)                    | 68 (0.17%)        | <u>5</u> (0.01%)             | <b>45</b> (0.11%) | 10 (0.02%)       | <b>43</b> (0.10%) |
| Jaccard   | <u>1</u> (0.00%)              | <b>2</b> (0.00%)  | 5 (0.01%)                    | 163 (0.40%)       | 6 (0.01%)        | 163 (0.40%)       |
| Count     | <u>8</u> (0.02%)              | 43 (0.10%)        | 33 (0.08%)                   | 318 (0.77%)       | 38 (0.09%)       | 261 (0.63%)       |
| Doc-count | <u>3</u> (0.01%)              | 21 (0.05%)        | 33 (0.08%)                   | 313 (0.76%)       | 38 (0.09%)       | 237 (0.58%)       |

Table 12: Open discovery results for A=PR:000009182 (Somatomedin C), C=CHEBI:29016 (Arginine), query year 1985,  $n = 41131$ .

| Metric    | Accumulation function $f_c$ ( |                  | Aggregation function $f_g$ ) |                  |                    |                  |
|-----------|-------------------------------|------------------|------------------------------|------------------|--------------------|------------------|
|           | sum(min)                      | max(min)         | sum(avg)                     | max(avg)         | sum(max)           | max(max)         |
| NPMI      | 58865 (100.00%)               | 12379 (21.03%)   | 58864 (100.00%)              | 17449 (29.64%)   | <u>174</u> (0.30%) | 7071 (12.01%)    |
| SCP       | <u>18</u> (0.03%)             | 28 (0.05%)       | 52 (0.09%)                   | 250 (0.42%)      | 52 (0.09%)         | 250 (0.42%)      |
| $\chi^2$  | 58865 (100.00%)               | 987 (1.68%)      | <u>54</u> (0.09%)            | 263 (0.45%)      | <u>54</u> (0.09%)  | 263 (0.45%)      |
| $t$ -test | 58865 (100.00%)               | 51 (0.09%)       | 58865 (100.00%)              | <u>1</u> (0.00%) | 5 (0.01%)          | <u>1</u> (0.00%) |
| LLR       | 58865 (100.00%)               | 101 (0.17%)      | <u>1</u> (0.00%)             | <u>1</u> (0.00%) | <u>1</u> (0.00%)   | <u>1</u> (0.00%) |
| Jaccard   | 6 (0.01%)                     | 461 (0.78%)      | <u>2</u> (0.00%)             | 237 (0.40%)      | <u>2</u> (0.00%)   | 240 (0.41%)      |
| Count     | <b>2</b> (0.00%)              | 3 (0.01%)        | <u>1</u> (0.00%)             | <u>1</u> (0.00%) | <u>1</u> (0.00%)   | <u>1</u> (0.00%) |
| Doc-count | 3 (0.01%)                     | <u>1</u> (0.00%) | <u>1</u> (0.00%)             | <u>1</u> (0.00%) | <u>1</u> (0.00%)   | <u>1</u> (0.00%) |

Table 13: Open discovery results for A=MESH:D000544 (Alzheimer’s disease), C=MESH:D004967 (Estrogen), query year 1991,  $n = 58866$ .

| Metric    | Accumulation function $f_c$ ( |                   | Aggregation function $f_g$ ) |                   |                    |                   |
|-----------|-------------------------------|-------------------|------------------------------|-------------------|--------------------|-------------------|
|           | sum(min)                      | max(min)          | sum(avg)                     | max(avg)          | sum(max)           | max(max)          |
| NPMI      | 58857 (99.99%)                | 8629 (14.66%)     | 58840 (99.96%)               | 9715 (16.50%)     | <u>30</u> (0.05%)  | 5545 (9.42%)      |
| SCP       | <u>124</u> (0.21%)            | 427 (0.73%)       | 405 (0.69%)                  | 1633 (2.77%)      | 405 (0.69%)        | 1631 (2.77%)      |
| $\chi^2$  | 58857 (99.99%)                | 13013 (22.11%)    | 457 (0.78%)                  | 1646 (2.80%)      | <u>452</u> (0.77%) | 1644 (2.79%)      |
| $t$ -test | 58854 (99.99%)                | 1808 (3.07%)      | 58846 (99.97%)               | 25666 (43.60%)    | <u>1</u> (0.00%)   | 23966 (40.72%)    |
| LLR       | 58854 (99.99%)                | 3407 (5.79%)      | <u>20</u> (0.03%)            | 76 (0.13%)        | <u>20</u> (0.03%)  | <b>70</b> (0.12%) |
| Jaccard   | <u>6</u> (0.01%)              | 1075 (1.83%)      | <u>6</u> (0.01%)             | 994 (1.69%)       | 9 (0.02%)          | 993 (1.69%)       |
| Count     | 8 (0.01%)                     | <b>28</b> (0.05%) | <u>6</u> (0.01%)             | <b>29</b> (0.05%) | <u>6</u> (0.01%)   | 24072 (40.90%)    |
| Doc-count | 7 (0.01%)                     | 31 (0.05%)        | <u>5</u> (0.01%)             | 31 (0.05%)        | <u>5</u> (0.01%)   | 24170 (41.06%)    |

Table 14: Open discovery results for A=MESH:D000544 (Alzheimer’s disease), C=MESH:D007213 (Indomethacin), query year 1991,  $n = 58862$ .

| Metric    | Accumulation function $f_c$ ( |                       | Aggregation function $f_g$ ) |                       |                       |                       |
|-----------|-------------------------------|-----------------------|------------------------------|-----------------------|-----------------------|-----------------------|
|           | sum(min)                      | max(min)              | sum(avg)                     | max(avg)              | sum(max)              | max(max)              |
| NPMI      | 41837 (65.89%)                | 33884 (53.37%)        | <u>16714</u> (26.32%)        | 29246 (46.06%)        | 22122 (34.84%)        | 38396 (60.47%)        |
| SCP       | 22002 (34.65%)                | 37252 (58.67%)        | 25093 (39.52%)               | 12955 (20.40%)        | 25192 (39.68%)        | <u>11340</u> (17.86%) |
| $\chi^2$  | 33790 (53.22%)                | 30165 (47.51%)        | 25171 (39.64%)               | 21321 (33.58%)        | 25863 (40.73%)        | <u>16825</u> (26.50%) |
| $t$ -test | 35556 (56.00%)                | 30949 (48.74%)        | 31641 (49.83%)               | 14148 (22.28%)        | <b>19755</b> (31.11%) | <u>9695</u> (15.27%)  |
| LLR       | 31629 (49.82%)                | 26828 (42.25%)        | <b>16398</b> (25.83%)        | <u>13184</u> (20.76%) | 21797 (34.33%)        | 13332 (21.00%)        |
| Jaccard   | <b>15834</b> (24.94%)         | <u>14880</u> (23.44%) | 21675 (34.14%)               | 19067 (30.03%)        | 22233 (35.02%)        | 17932 (28.24%)        |
| Count     | 17387 (27.38%)                | <b>14281</b> (22.49%) | 21150 (33.31%)               | 10711 (16.87%)        | 21260 (33.48%)        | <u>2470</u> (3.89%)   |
| Doc-count | 17326 (27.29%)                | 14301 (22.52%)        | 21089 (33.22%)               | <b>10630</b> (16.74%) | 21213 (33.41%)        | <u>2401</u> (3.78%)   |

Table 15: Open discovery results for A=MESH:D012559 (Schizophrenia), C=PR:000012942 (Calcium Independent Phospholipase A<sub>2</sub>), query year 1993,  $n = 63492$ .

## 5 Manual analysis

This section details the task setting and results of the manual analysis.

Each case is defined by a query year and either an (A,C) term pair (closed discovery) or an A term (open discovery). In closed discovery, the annotators were provided with B terms and asked to decide for each *is there a potential biologically meaningful connection between A and C via B*. In open discovery, annotators were provided with C terms and asked to decide for each *is there a potential biologically meaningful indirect connection between A and C*.

The annotators were asked to consider each case in the context of its query year (i.e. reflecting the state of published knowledge at the time) and record their judgment for each candidate simply as “yes” or “no”. For open discovery, annotators were additionally instructed to answer “no” for any known *direct* connections between the query term A and any candidate C.

The candidates and annotator judgments are shown in Tables 16-20 for closed discovery and Tables 21-25 for open discovery.

| B ID         | B name                         | judgment |
|--------------|--------------------------------|----------|
| PR:000025365 | cytochrome c oxidase subunit 2 | no       |
| MESH:D003110 | Colonic Neoplasms              | no       |
| PR:000003035 | cellular tumor antigen p53     | yes      |
| PR:000013428 | prostaglandin G/H synthase 2   | yes      |
| PR:000005121 | G1/S-specific cyclin-D1        | yes      |
| PR:000002198 | catenin beta-1                 | yes      |
| MESH:D010190 | Pancreatic Neoplasms           | no       |
| HOC:92       | Growth promoting signals       | no       |
| HOC:9        | Proliferative signaling        | no       |
| MESH:D009369 | Neoplasms                      | no       |

Table 16: Closed discovery analysis for A=PR:000001754 (NF- $\kappa$ B), C=MESH:D000236 (Adenoma), query year 2011.

| B ID         | B name                                                            | judgment |
|--------------|-------------------------------------------------------------------|----------|
| PR:000007106 | endothelial PAS domain-containing protein 1                       | no       |
| PR:000011152 | neurogenic differentiation factor 1                               | no       |
| PR:000001412 | CD86 molecule                                                     | no       |
| PR:000026269 | survival motor neuron protein                                     | no       |
| PR:000003809 | alpha-fetoprotein                                                 | yes      |
| PR:000015058 | solute carrier family 2, facilitated glucose transporter member 1 | no       |
| MESH:D006528 | Carcinoma, Hepatocellular                                         | no       |
| PR:000006066 | stromal cell-derived factor 1                                     | yes      |
| PR:000012332 | histone acetyltransferase KAT2B                                   | yes      |
| PR:000001393 | interleukin-6                                                     | yes      |

Table 17: Closed discovery analysis for A=PR:000011331 (NOTCH1), C=PR:000005308 (C/EBP $\beta$ ), query year 2011.

| B ID         | B name                                 | judgment |
|--------------|----------------------------------------|----------|
| MESH:C001899 | triptolide                             | no       |
| PR:000010413 | macrophage migration inhibitory factor | no       |
| PR:000002206 | mitogen-activated protein kinase 8     | yes      |
| PR:000002121 | C-C motif chemokine 13                 | no       |
| PR:000005308 | CCAAT/enhancer-binding protein beta    | yes      |
| PR:000005145 | cyclin-dependent kinase 20             | no       |
| PR:000006063 | growth-regulated alpha protein         | yes      |
| MESH:C093642 | SB 203580                              | no       |
| PR:000010902 | mast cell protease 1                   | no       |
| PR:000010488 | stromelysin-1                          | no       |

Table 18: Closed discovery analysis for A=PR:000001138 (IL-17), C=PR:000006736 (MKP-1), query year 2010.

| B ID         | B name                                              | judgment |
|--------------|-----------------------------------------------------|----------|
| MESH:D064420 | Drug-Related Side Effects and Adverse Reactions     | no       |
| PR:000017049 | UDP-glucuronosyltransferase 1-10                    | no       |
| MESH:D005978 | Glutathione                                         | yes      |
| PR:000000103 | mitogen-activated protein kinase 1                  | yes      |
| PR:000001962 | tumor necrosis factor receptor superfamily member 6 | yes      |
| MESH:D009393 | Nephritis                                           | no       |
| PR:000007597 | proto-oncogene c-Fos                                | yes      |
| PR:000014413 | protein S100-A6                                     | yes      |
| PR:000001970 | vascular cell adhesion protein 1                    | yes      |
| PR:000007498 | fibroblast growth factor 7                          | no       |

Table 19: Closed discovery analysis for A=PR:000011170 (Nrf2), C=MESH:D010190 (pancreatic cancer), query year 2006.

| B ID         | B name                       | judgment |
|--------------|------------------------------|----------|
| CHEBI:61432  | phosphotungstic acid polymer | no       |
| MESH:D006331 | Heart Diseases               | no       |
| MESH:D015470 | Leukemia, Myeloid, Acute     | no       |
| PR:000017445 | protein Wnt-5a               | yes      |
| MESH:D003111 | Colonic Polyps               | no       |
| MESH:C012589 | trichostatin A               | yes      |
| PR:000001850 | cathepsin K                  | yes      |
| PR:000002193 | apoptosis regulator BAX      | yes      |
| MESH:C471405 | sorafenib                    | yes      |
| MESH:C562463 | Pancreatic Carcinoma         | no       |

Table 20: Closed discovery analysis for A=PR:000006066 (CXCL12), C=MESH:D013964 (thyroid cancer), query year 2012.

| C ID           | C name                      | judgment |
|----------------|-----------------------------|----------|
| MESH:D002869   | Chromosome Aberrations      | no       |
| PR:000011387   | neuropeptide Y              | no       |
| PR:000004900   | complement C3               | no       |
| MESH:D019342   | Acetic Acid                 | no       |
| MESH:D002331   | Carnitine                   | no       |
| CHEBI:16027    | adenosine 5'-monophosphate  | no       |
| PR:000001843   | Thy-1 membrane glycoprotein | yes      |
| MESH:D009503   | Neutropenia                 | no       |
| NCBITaxon:3847 | Glycine max                 | no       |
| MESH:D013921   | Thrombocytopenia            | yes      |

Table 21: Open discovery analysis for A=PR:000001754 (NF- $\kappa$ B), query year 2011.



| C ID         | C name                                                     | judgment |
|--------------|------------------------------------------------------------|----------|
| PR:000002035 | beta-type platelet-derived growth factor receptor          | no       |
| PR:000002317 | caspase-8                                                  | yes      |
| PR:000000364 | smad2                                                      | no       |
| MESH:C113580 | U 0126                                                     | no       |
| PR:000000176 | GTP-binding protein RhoA                                   | no       |
| MESH:D053632 | X-Linked Combined Immunodeficiency Diseases                | no       |
| PR:000010125 | dual specificity mitogen-activated protein kinase kinase 1 | yes      |
| PR:000008902 | interferon alpha-inducible protein 27                      | yes      |
| PR:000006937 | early growth response protein 1                            | no       |
| MESH:D020151 | Protein C Deficiency                                       | no       |

Table 22: Open discovery analysis for A=PR:000011331 (NOTCH1), query year 2011.

| C ID           | C name                                               | judgment |
|----------------|------------------------------------------------------|----------|
| PR:000002309   | caspase-1                                            | no       |
| PR:000012289   | poly [ADP-ribose] polymerase 1                       | yes      |
| MESH:D000241   | Adenosine                                            | no       |
| NCBITaxon:9615 | Canis lupus familiaris                               | no       |
| PR:000009054   | insulin                                              | no       |
| PR:000001465   | high affinity immunoglobulin gamma Fc receptor I     | yes      |
| CHEBI:35366    | fatty acid                                           | no       |
| PR:000024839   | heat shock 70 kDa protein 1B                         | yes      |
| PR:000002998   | tyrosine-protein kinase Lck                          | yes      |
| CHEBI:52450    | 2-O-acetyl-1-O-octadecyl-sn-glycero-3-phosphocholine | no       |

Table 23: Open discovery analysis for A=PR:000001138 (IL-17), query year 2010.

| C ID         | C name                                        | judgment |
|--------------|-----------------------------------------------|----------|
| PR:000002112 | vascular endothelial growth factor receptor 2 | yes      |
| MESH:D008545 | Melanoma                                      | yes      |
| MESH:D000244 | Adenosine Diphosphate                         | no       |
| PR:000007840 | glyceraldehyde-3-phosphate dehydrogenase      | yes      |
| MESH:C038491 | allyl sulfide                                 | no       |
| PR:000007640 | forkhead box protein O1                       | yes      |
| MESH:D011064 | Poly Adenosine Diphosphate Ribose             | no       |
| PR:000000182 | TGF-beta 1                                    | no       |
| MESH:D017239 | Paclitaxel                                    | yes      |
| PR:000006130 | cytochrome P450 3A4                           | no       |

Table 24: Open discovery analysis for A=PR:000011170 (Nrf2), query year 2006.

| C ID         | C name                              | judgment |
|--------------|-------------------------------------|----------|
| MESH:D012175 | Retinoblastoma                      | no       |
| PR:000001945 | transferrin receptor protein 1      | no       |
| PR:000001153 | Toll-like receptor 2                | yes      |
| PR:000003414 | heat shock 70 kDa protein 4         | no       |
| PR:000016285 | protransforming growth factor alpha | yes      |
| MESH:D018235 | Smooth Muscle Tumor                 | no       |
| CHEBI:4806   | (-)-epigallocatechin 3-gallate      | no       |
| PR:000001905 | platelet glycoprotein 4             | yes      |
| PR:000001083 | CD2 molecule                        | no       |
| MESH:C059514 | resveratrol                         | no       |

Table 25: Open discovery analysis for A=PR:000006066 (CXCL12), query year 2012.
